# Supplementary material
Source: PubMed Central journal article supplement (PMC9717661)
Supplement: KID.0003002022-s0001.pdf [file KID.0003002022-s0001.pdf]

**Supplemental Table 1.** Condition-specific ICD-9 and ICD-10 diagnostic codes used in this study

Ischemic stroke or transient ischemic attack  
**ICD-9-CM:** 362.3x, 433.x1, 434.x1, 436  
**ICD-10 CM:** H34.1, I63

Systemic embolism  
**ICD-9-CM:** 434.1, 444.xx, 445.xx  
**ICD-10 CM:** I74, I75

Myocardial infarction  
**ICD-9-CM:** 410.xx  
**ICD-10 CM:** I21.x(x), I22.x(x)

Hemorrhagic stroke  
**ICD-9-CM:** 430, 431, 432  
**ICD-10 CM:** I60, I61, I62

**Major bleeding**

1. Resulting in death  
**DEATHFM:** 38, 39, 40, 41, 42, 43, 72

2. Intracranial  
**ICD-9-CM:** 430, 431, 432.x

**ICD-10 CM:** I60, I61, I62

**Supplemental Table 2.** Crude number of events

| Outcome                                                                                  | P2Y12 status at baseline | Events (apixaban arm) | Events (no anticoagulation arm) |
|------------------------------------------------------------------------------------------|--------------------------|-----------------------|---------------------------------|
| Stroke (ischemic or hemorrhagic), transient ischemic attack, or systemic thromboembolism | Yes                      | <11                   | 29                              |
|                                                                                          | No                       | 22                    | 70                              |
| Fatal or intracranial bleeding                                                           | Yes                      | <11                   | <11                             |
|                                                                                          | No                       | <11                   | 37                              |
| Ischemic stroke or myocardial infarction                                                 | Yes                      | <11                   | 119                             |
|                                                                                          | No                       | 34                    | 254                             |
